# Supplementary material for: A bacterial tyrosine phosphatase modulates cell proliferation through targeting RGCC
Source: PubMed Central journal article supplement (PMC8172045; doi:10.1371/journal.ppat.1009598), 2021-05-20
Supplement: ppat.1009598.s001.pdf [file ppat.1009598.s001.pdf]

**Table S1. Bacterial Strains used in this study**

| Strain                    | Relevant characteristics                                                                                                                                                                                                  | Source or reference |
|---------------------------|---------------------------------------------------------------------------------------------------------------------------------------------------------------------------------------------------------------------------|---------------------|
| <i>P. gingivalis</i>      |                                                                                                                                                                                                                           |                     |
| 33277                     | Type strain                                                                                                                                                                                                               | ATCC                |
| $\Delta fimA$             | Isogenic mutant of 33277 lacking major fimbrial gene <i>fimA</i> , Erm <sup>r</sup>                                                                                                                                       | [1]                 |
| $\Delta mfa1$             | Isogenic mutant of 33277 lacking minor fimbrial gene <i>mfa1</i> , Erm <sup>r</sup>                                                                                                                                       | [2]                 |
| $\Delta ltp1$             | Isogenic mutant of 33277 lacking the low molecular tyrosine phosphatase gene <i>ltp1</i> , Erm <sup>r</sup>                                                                                                               | [3]                 |
| $\Delta ltp1+ltp1$        | Isogenic mutant of 33277 lacking the low molecular tyrosine phosphatase gene <i>ltp1</i> , and complemented with PT-COW-Ltp1, expressing functional Ltp1. Erm <sup>r</sup> and Tet <sup>r</sup>                           | [3]                 |
| $\Delta ltp1+ltp1^{C10S}$ | Isogenic mutant of 33277 lacking the low molecular tyrosine phosphatases gene <i>ltp1</i> , and complemented with PT-COW-Ltp1 <sup>C10S</sup> , expressing catalytically dead Ltp1. Erm <sup>r</sup> and Tet <sup>r</sup> | [3]                 |
| $\Delta php1$             | Isogenic mutant of 33277 lacking the tyrosine phosphatase gene <i>php1</i> , Erm <sup>r</sup>                                                                                                                             | [4]                 |
| <i>Escherichia coli</i>   |                                                                                                                                                                                                                           |                     |
| TOP10                     | Chemically competent cells                                                                                                                                                                                                | Invitrogen          |

<sup>a</sup>Erm<sup>r</sup>, Tet<sup>r</sup>, and Amp<sup>r</sup> indicate resistance to erythromycin, tetracycline, and ampicillin, respectively.

#### References

1. Yilmaz O, Watanabe K, Lamont RJ. Involvement of integrins in fimbriae-mediated binding and invasion by *Porphyromonas gingivalis*. *Cell Microbiol* 2002; 4: 305-314.
2. Park Y, Simionato MR, Sekiya K, Murakami Y, James D, Chen W, *et al.* Short fimbriae of *Porphyromonas gingivalis* and their role in coadhesion with *Streptococcus gordonii*. *Infect Immun* 2005; 73: 3983-3989.
3. Maeda K, Tribble GD, Tucker CM, Anaya C, Shizukuishi S, Lewis JP, *et al.* A *Porphyromonas gingivalis* tyrosine phosphatase is a multifunctional regulator of virulence attributes. *Mol Microbiol* 2008; 69: 1153-1164.
4. Jung YJ, Miller DP, Perpich JD, Fitzsimonds ZR, Shen D, Ohshima J, *et al.* *Porphyromonas gingivalis* tyrosine phosphatase Php1 promotes community development and pathogenicity. *mBio* 2019; 10: e02004-19.
