# Supplementary material for: A bacterial tyrosine phosphatase modulates cell proliferation through targeting RGCC
Source: PubMed Central journal article supplement (PMC8172045; doi:10.1371/journal.ppat.1009598), 2021-05-20
Supplement: ppat.1009598.s002.pdf [file ppat.1009598.s002.pdf]

**Table S2. Eukaryotic cells**

| Cell name  | Relevant characteristics                          | Reference or source |
|------------|---------------------------------------------------|---------------------|
| TIGK       | Telomerase immortalized gingival epithelial cells | [1]                 |
| OKF6/TERT2 | Telomerase immortalized oral mucosa cells         | [2]                 |
| EC9706     | Derived from esophageal squamous cell carcinoma   | ATCC                |
| SCC-9      | Derived from tongue squamous cell carcinoma       | ATCC                |
| HeLa       | Derived from cervical cancer                      | ATCC                |

#### References

1. Moffatt-Jauregui CE, Robinson B, de Moya AV, Brockman RD, Roman AV, Cash MN, *et al.* Establishment and characterization of a telomerase immortalized human gingival epithelial cell line. *J Periodontal Res* 2013; 48: 713-721.
2. Dickson MA, Hahn WC, Ino Y, Ronfard V, Wu JY, Weinberg RA, *et al.* Human keratinocytes that express hTERT and also bypass a p16<sup>INK4a</sup>-enforced mechanism that limits life span become immortal yet retain normal growth and differentiation characteristics. *Mol Cell Biol* 2000; 20: 1436-1447.
