# Supplementary material for: A bacterial tyrosine phosphatase modulates cell proliferation through targeting RGCC
Source: PubMed Central journal article supplement (PMC8172045; doi:10.1371/journal.ppat.1009598), 2021-05-20
Supplement: ppat.1009598.s003.pdf [file ppat.1009598.s003.pdf]

**Table S3. Primers used in this study**

| Name                   | Primer sequence (5' – 3')               | Function                                                              |
|------------------------|-----------------------------------------|-----------------------------------------------------------------------|
| RTLtp1F                | ACGGGAGAGCGAAGTGAGAT                    | Reverse-transcriptase PCR primers to determine <i>ltp1</i> expression |
| RTLtp1R                | GTCTGCCGAGGCTGTCTTT                     |                                                                       |
| RTPhp1F                | GCGATCAAAAAGCAAGGCGT                    | Reverse-transcriptase PCR primers to determine <i>php1</i> expression |
| RTPhp1R                | AGAAGCCTCGGACAGCAATC                    |                                                                       |
| Ltp1F                  | CGGGATCCCGATGAAGCCACATAAAATCCTATTCGTATG | Generation of pcDNA3.1-Ltp1                                           |
| Ltp1R                  | GGAATTCCTCAGTCGCATGCGGATTGG             |                                                                       |
| Php1F                  | CGGGATCCCATGTTTTCTATTTTCAAGCGAAAAAC     | Generation of pcDNA3.1-Php1                                           |
| Php1R                  | GGAATTCCTAAGAAAAACAATCGGGTGTTG          |                                                                       |
| FLtp1F                 | GCTCGGATCCATGAAGCCACATAAAATCCTATTCGTATG | Generation of pcDNA3.1-Flag-Ltp1                                      |
| FLtp1R                 | AGTGGCGGCCGCTCAGTCGCATGCGGATTGG         |                                                                       |
| FPhp1F                 | GCTCGGATCCATGTTTTCTATTTTCAAGCGAAAAAC    | Generation of pcDNA3.1-Flag-Php1                                      |
| FPhp1R                 | AGTGGCGGCCGCTAAGAAAAACAATCGGGTGTTG      |                                                                       |
| Ltp1 <sup>C10S</sup> F | CCTATTCGTAAGTCTCGGCAAC                  | Generation of pcDNA3.1-Ltp1 <sup>C10S</sup>                           |
| Ltp1 <sup>C10S</sup> R | ATTTTATGTGGCTTCATTCAG                   |                                                                       |
